# Supplementary material for: Regional centroid moment tensor inversion of small to moderate earthquakes in the Alps using the dense AlpArray seismic network: challenges and seismotectonic insights
Source: Copernicus journal article supplement (doi:10.5194/se-12-1233-2021), 2021-06-02
Supplement: Supplementary file 2 [file se-12-1233-2021-supplement.zip]

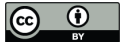

*Supplement of*

**Regional centroid moment tensor inversion of small to moderate earthquakes in the Alps using the dense AlpArray seismic network: challenges and seismotectonic insights**

**Gesa Maria Petersen et al.**

*Correspondence to:* Gesa Maria Petersen (gesap@gfz-potsdam.de)

- se-12-1233-2021-supplement-title-page.pdf
- supplement
  - AA\_MT\_supplement\_rev\_clean.pdf
  - Alps\_2016-2019\_CMT-best-solutions\_Petersen.csv
  - Alps\_2016-2019\_CMT-statistics-solutions\_Petersen.csv

The copyright of individual parts of the supplement might differ from the article licence.
